# Supplementary material
Source: publisher figshare collection journal article supplement (https://gsajournals.figshare.com/ndownloader/files/15009230)
Supplement: Supplementary file 1 [file 15009230]

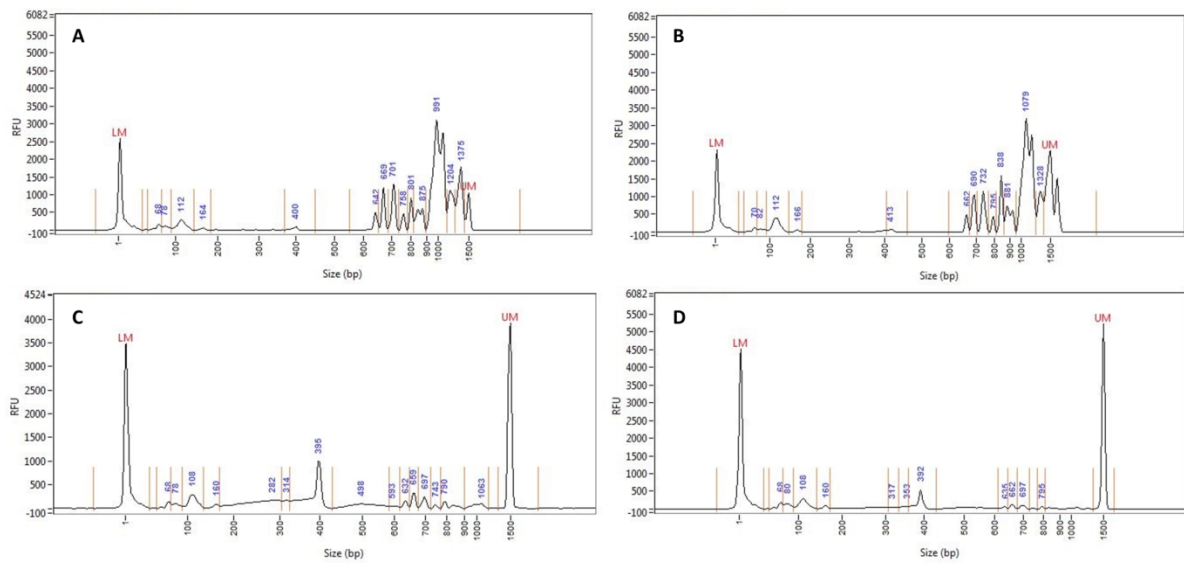

**Figure S4:** FA analysis of pooled and fragmented PCR amplicons prior to library preparation. Panels A and B show two of 48 tested pools prior to fragmentation. A population of fragments of distinct sizes is observed, with some overlapping with the upper marker (1500bp). Panels C and D show the pools after fragmentation with parameter #13.
